# Supplementary material
Source: PubMed Central journal article supplement (PMC3913736)

S1

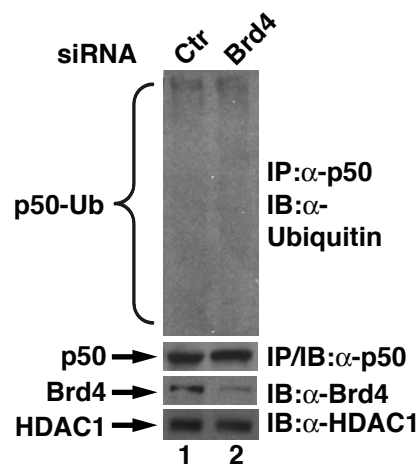

S2

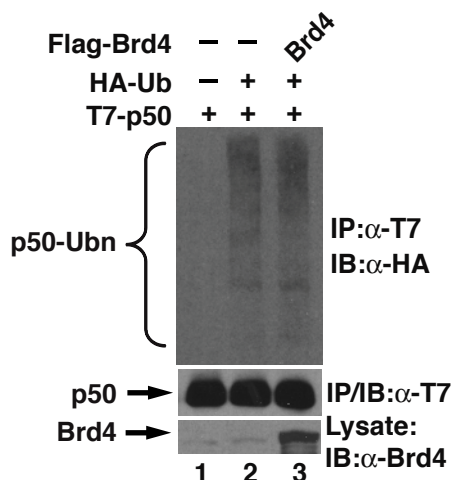

S3

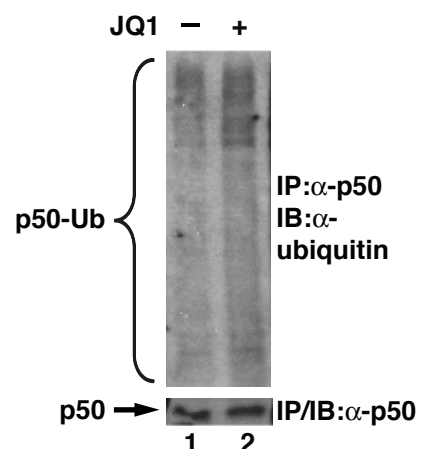

S4

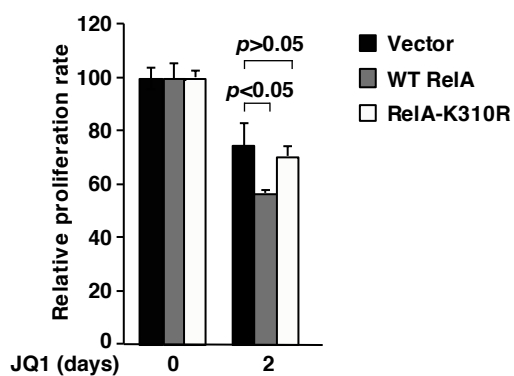

S5

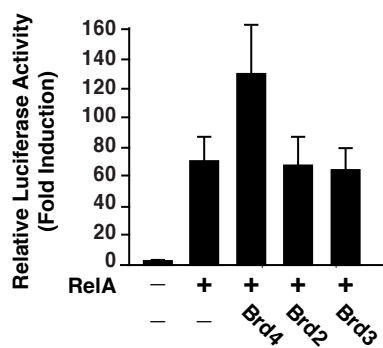

S6

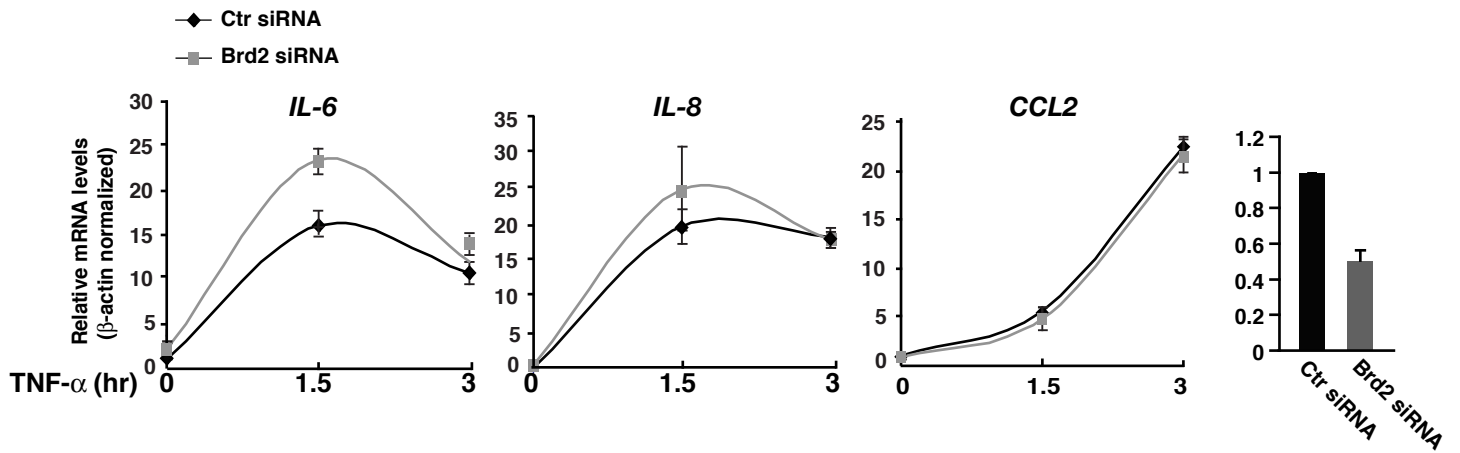

S7

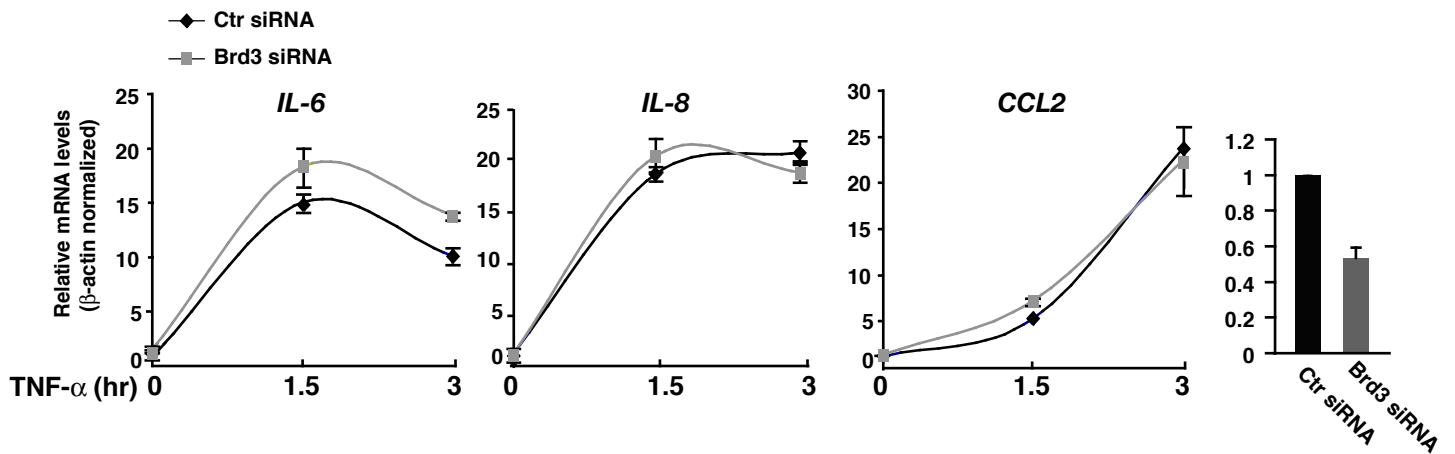

S8

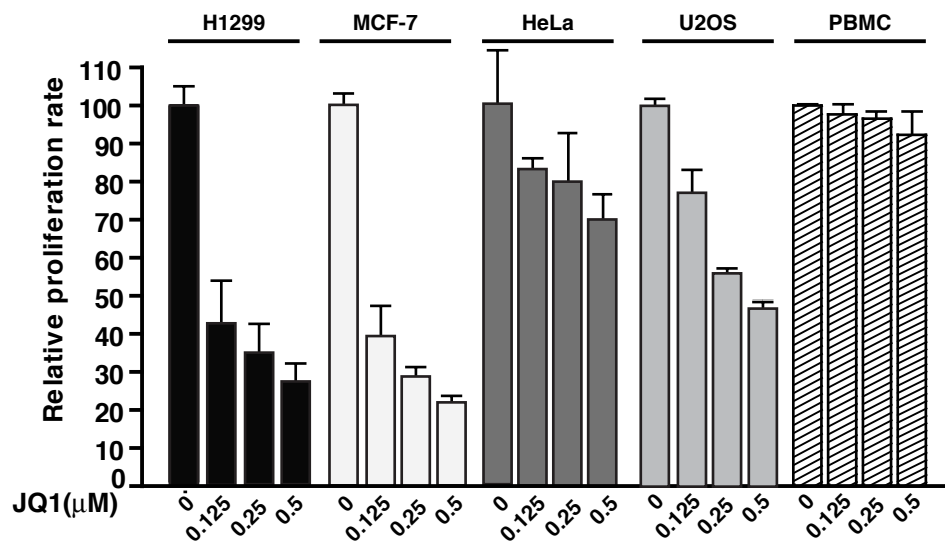

Supplement: NIHMS549750-supplement-supplement_1.pdf [file NIHMS549750-supplement-supplement_1.pdf]
